# Supplementary material for: Exquisite Sensitivity of TP53 Mutant and Basal Breast Cancers to a Dose-Dense Epirubicin−Cyclophosphamide Regimen
Source: PLoS Med. 2007 Mar 20;4(3):e90. doi: 10.1371/journal.pmed.0040090 (PMC1831731; doi:10.1371/journal.pmed.0040090)
Supplement: Table S1 — Sets: S1, single amplification for microarray; S2, double amplification for microarray; S3, tumors not analyzed by microarray, but used for RT-PCR and/or immunohistochemical studies. The raw data for quantitative RT-PCR analysis (ddCT) or other immunohistochemical tests are highlighted in yellow. C, complete; DOD, died of disease; EC, epirubicin/cyclophosphamide; ET, epirubicin/docetaxel; KRT, cytokeratin; NA, not applicable; NC, not complete; nd, not done; wd, without disease; META, metastatic; METADiag, metastatic at diagnosis; TNM, tumor, node, metastasis. (52 KB PDF) [file pmed.0040090.st001.xls]

## Sheet: ddct pcr data
Patient	TNM	Grade	Stromal cells %	Treatment	Group	TP53 status	Basal KRT (IHC)	ESR1 (IHC)	CDKN2A, p16 (IHC)	ERBB2 (RT-PCR)	Pathological response	Follow-up (months)	PROM1	TMSNB	KRT7	RIS1	PHLDA2	MAFF	ADM	TTK	CDC20	CDKN2A, p14	CDKN2A, p16	ESR1	ERBB2	PROM1 (IHC)	KRT5/6 (IHC)	KRT17 (IHC)
P1	T4bN1M0	2	10	EC	S3	wt	neg	neg	POS	neg	NC	52 alive wd	0.5	-0.21	4.17	1.72	1.035	-0.09	-0.13	1.29	0.3	0	0.69	-4.52	-0.736966	nd	neg	neg
P2	T4aN0M0	3	20	EC	S1	wt	neg	POS	neg	POS	NC	73 alive wd	3.38	-2.38	1.49	-0.18	-6.275	-3.61	0.06	nd	0.825	-5.71	-6.9	-1	4.9542	POS	neg	neg
P3	T3N1M0	3	50	EC	S3	MUT	POS	POS	POS	neg	C	40 alive wd	3.63	-0.4	0.94	4.21	-0.105	0.23	2.24	-1.15	2.065	4.03	3.12	-2.01	-0.577767	POS	POS	neg
P4	T3N0M0	3	20	EC	S2	MUT	POS	neg	POS	neg	C	90 alive wd	2.96	3.56	1.11	2.87	1.025	0.88	2.04	1.64	2.015	3.71	4.47	-5.83	-0.321928	nd	POS	POS
P5	T3N2M0	2	20	EC	S3	wt	POS	POS	nd	POS	NC	32 alive wd	-0.79	-2.87	1.7	2.86	2.365	-0.55	-0.1	-2.38	-0.015	0.98	1.57	-0.14	2.90689	neg	neg	POS
P6	T4bN1bM0	3	20	EC	S3	wt	neg	POS	neg	neg	NC	24 META 46 alive	-0.71	-0.96	-2.04	-0.87	nd	1.01	nd	0.37	-1.835	-4.41	-5.63	3.07	0.400538	nd	neg	neg
P7	T3N1M1	2	10	EC	NA	wt	neg	POS	neg	neg	NC	METADiag 69 alive	3.26	-0.88	-2.31	-1.45	nd	nd	nd	-0.12	-2.405	-5.89	-4.97	2.79	-1	nd	neg	neg
P8	T4aN2M1	1	10	EC	S3	wt	neg	POS	neg	neg	NC	METADiag 14 DOD	-0.07	-0.37	-0.21	-1.88	-2.125	0.04	0.25	-1.38	-2.635	0.55	1.03	0.87	-0.152003	nd	neg	neg
P9	T3N0M0	2	30	EC	S3	wt	neg	POS	neg	neg	NC	45 alive wd	1.01	0.01	-3.31	-1.6	-0.145	-1.47	-2.32	-0.68	-2.985	-0.42	0.13	1.97	0.263034	nd	neg	neg
P10	T3N1M0	3	30	EC	S1	MUT	neg	neg	POS	neg	NC	18 META 24 DOD	0.68	0.09	-2.82	3.57	-0.945	0.07	0.91	2.28	2.785	4.61	3.86	-1.77	0	POS	neg	neg
P11	T4cN1M0	3	20	EC	S3	MUT	neg	POS	neg	POS	C	17 META 32 alive	-4.7	2.35	-3.43	1.96	2.315	0.3	3.54	0.36	1.165	-3.58	-3.68	-1.48	2.80735	neg	neg	neg
P12	T4bN2M0	2	10	EC	S3	wt	neg	POS	neg	neg	NC	66 alive wd	1.38	-0.34	0.04	0.07	1.645	-1.23	0.35	0.14	-0.395	-1.34	-2.56	3.29	-0.321928	nd	neg	neg
P13	T4bN1M0	2	20	EC	S3	wt	neg	POS	neg	neg	NC	89 alive wd	-4.13	1.25	-0.32	-0.11	0.845	0.08	-1.13	-0.86	-0.055	0.14	-0.89	3.36	0.847997	nd	neg	neg
P14	T4bN1bM0	2	10	EC	S3	wt	neg	POS	neg	neg	NC	55 alive wd	-0.83	-2.53	-0.32	-1.86	1.415	0.55	-0.08	-2.65	-0.895	-4.55	-3.98	2.51	1.848	nd	neg	neg
P15	T4bN0M0	3	10	EC	S1	MUT	neg	POS	neg	neg	NC	45 alive wd	2.18	nd	nd	nd	1.515	0.32	1.91	-1	1.485	1.55	2.11	-1.77	0.137504	nd	neg	neg
P16	T4bN1M0	3	20	EC	S3	wt	neg	POS	nd	neg	NC	36 META alive	0.33	-0.35	-2.07	-2.4	-0.925	-1.36	-3.23	nd	-0.325	1.03	0.07	0.2	0.584963	nd	neg	neg
P17	T3N1M1	2	10	EC	S1	wt	neg	POS	nd	neg	NC	34 META 36 alive	0.21	2.62	0.52	2.33	-2.165	-0.59	-2.63	0.08	-0.715	-1.13	0.28	0.49	-0.736966	POS	neg	neg
P18	T4bN1M0	2	10	EC	S1	wt	neg	POS	neg	neg	NC	3 alive wd	-6.25	4.36	-3.51	0.75	-4.765	0.05	-1.41	0.7	-0.655	0.07	-4.62	0.61	-0.514573	neg	neg	neg
P19	T4bN1M1	2	50	EC	S3	wt	neg	POS	neg	neg	NC	METADiag 9 DOD	3.83	-0.07	-1.26	-2.21	-1.505	0.45	0.61	0.08	-1.535	-3.18	-3.06	3.15	-1	POS	neg	neg
P20	T3N0M0	2	10	EC	S3	wt	neg	POS	neg	neg	NC	28 META 40 alive	1.35	1.2	-1.21	0.37	-1.175	-2.07	-1.23	-0.11	-0.595	-0.21	0.55	3.28	-1	nd	neg	neg
P21	T2N0M1	3	70	EC	S1	MUT	neg	neg	POS	POS	NC	METADiag 27 DOD	2.3	2.9	0.05	0.83	-0.765	-0.88	1.95	1.38	1.155	1.03	-1.5	-3.13	4	nd	neg	neg
P22	T3N1M0	2	10	EC	S1	wt	neg	POS	neg	neg	NC	19 alive wd	-4.01	-2.56	0.19	-2.84	-0.325	-1.55	-0.99	-0.36	nd	1.65	-2.27	2.65	-0.514573	neg	neg	neg
P23	T2N2M0	3	30	EC	S1	MUT	neg	neg	neg	POS	C	67 alive wd	1.37	-0.84	1.63	-0.27	1.085	-0.27	1.14	1.1	1.255	2.4	2	-5.08	3.90689	POS	neg	neg
P24	T3N1M0	3	70	EC	S1	wt	neg	POS	neg	neg	NC	53 alive wd	-1	-0.43	0.77	1.11	0.805	-0.26	-0.06	-0.6	-0.785	-0.5	0.82	-0.18	0	nd	neg	neg
P25	T3N1M0	2	10	EC	S1	wt	neg	POS	neg	neg	NC	43 META 47 alive	-1.46	nd	nd	nd	-5.405	-2.64	-1.98	0	nd	-3.51	-3.96	1.12	-1	neg	neg	neg
P26	T4bN3M0	3	10	EC	S3	MUT	neg	POS	neg	neg	NC	60 alive ovarian cancer	-2.97	-2.89	4.23	3.43	-2.975	-5.11	0.38	-0.7	0.145	-2.46	-5.75	1.66	-1.32193	neg	neg	neg
P27	T4cN0M0	2	10	EC	S1	wt	neg	POS	neg	neg	NC	61 alive wd	-7.81	-0.34	-2.26	0.26	-0.995	0.42	-3.93	0.13	-1.215	-2.92	-1.36	0.87	1.26303	POS	neg	neg
P28	T4cN1bM1	2	30	EC	S3	wt	neg	POS	neg	neg	NC	METADiag 24 alive	0.23	0.71	-1.26	-0.73	-3.345	-1.68	-0.61	-2.62	-0.685	-1.32	-1.03	2.26	0.678072	neg	neg	neg
P29	T4bN0M0	3	10	EC	S3	wt	neg	POS	neg	neg	NC	78 alive wd	-4.32	2.37	-6.53	-1.2	-1.145	-0.99	-2.69	0.79	-1.335	1.23	-0.28	1.15	-0.514573	neg	neg	neg
P30	T4cN1M0	2	10	EC	S2	wt	neg	POS	neg	neg	NC	19 META 35 alive	-0.03	nd	-2.08	2.87	0.335	0.25	-2.29	-0.44	-1.825	0.2	0.18	0.95	-1	nd	neg	neg
P31	T3N1bM0	3	20	EC	S3	MUT	neg	POS	neg	POS	NC	57 alive wd	2.36	2.63	-0.97	-1.04	-0.035	-1.06	-2.21	1.47	-0.285	-1.45	-1.8	-0.22	4.90689	POS	neg	neg
P32	T4bN0M0	2	10	EC	S3	wt	neg	POS	neg	neg	NC	51 alive wd	-0.97	-1.14	-3.62	-1.51	nd	0.92	nd	-0.84	-3.115	-5.52	-4.19	1.41	-0.321928	nd	neg	neg
P33	T3N1M0	2	10	EC	S2	wt	neg	POS	neg	neg	NC	49 alive wd	-1.04	-0.04	-1	-0.79	-2.805	-1.99	-2.25	-0.94	-2.525	-3.15	-3.44	0.88	-1	neg	neg	neg
P34	T3N1aM0	3	10	EC	S1	wt	neg	POS	neg	neg	NC	24 META 50 alive	-2.97	1.12	-0.44	0.06	1.325	-0.63	0.1	1.65	0.585	0.78	-3.34	-0.02	0.584963	neg	neg	neg
P35	T3N1M0	3	10	EC	S3	wt	neg	POS	neg	neg	NC	29 META 37 alive	-3.91	1.42	-7.19	-0.41	-3.915	-5.96	-1.89	0.49	-1.105	-4.13	-5.22	1.66	-0.736966	neg	neg	neg
P36	T3N1M0	3	50	EC	S3	wt	neg	neg	neg	POS	NC	72 alive wd	2.91	-0.43	1.83	-1.63	0.215	-1.78	-0.15	-0.01	0.245	0.21	-0.83	-3.31	4.80735	nd	neg	neg
P37	T4bN1bM0	3	50	EC	S3	MUT	neg	neg	neg	POS	NC	42 alive wd	2.7	1.22	2.76	0.58	2.655	0.36	0.91	0.75	0.535	-3.44	-5.84	-7.19	5.42626	POS	neg	neg
P38	T4bN2M1	3	30	EC	S1	wt	neg	POS	neg	POS	NC	METADiag 34 alive	-0.98	-3.03	-2.24	-0.3	-0.045	-0.46	-2.8	1.36	0.875	-1.84	-1.26	-0.52	3.70044	nd	neg	neg
P39	T3N2M0	2	20	EC	S1	wt	neg	POS	neg	neg	NC	33 META 42 alive	-1.87	0.58	-3.87	0.57	0.835	-0.7	0.42	-0.8	-1.115	0.87	0.59	-1.99	-0.152003	nd	neg	neg
P40	T4bN1M1	3	10	EC	S3	wt	neg	POS	neg	neg	NC	METADiag 65 alive	-3.51	-3.11	0.57	-1.38	-0.215	-0.51	0.06	0.15	0.205	-0.74	-2.98	1.61	0.925999	neg	neg	neg
P41	T3N0M0	3	20	EC	S3	wt	neg	POS	neg	neg	NC	57 META 71 alive	0	1.48	-2.98	-0.14	-2.315	-4.74	-4.02	0.91	0.745	-0.21	1.41	1.16	-2.32193	POS	neg	neg
P42	T3N1M0	3	20	EC	S1	MUT	POS	POS	POS	POS	C	45 alive wd	1.14	-0.84	1.1	1.67	1.695	1.13	0.23	0.14	1.685	2.22	1.68	-2.04	3.80735	POS	neg	POS
P43	T4bN1M1	3	30	EC	S3	wt	neg	neg	neg	POS	NC	METADiag 4 alive	-3.93	0.2	2.57	2.49	4.685	0.55	1.51	0.76	0.015	-1.63	-3.14	-6.53	5.45943	neg	neg	neg
P44	T2N0M0	2	10	EC	S3	wt	neg	POS	neg	neg	NC	31 META 46 alive	-1.23	-0.28	-2.31	-0.61	1.305	-0.62	2.03	-0.47	-1.915	0.28	-0.78	2.49	-0.152003	POS	neg	neg
P45	T4bN2M0	2	10	EC	S3	wt	neg	POS	neg	neg	NC	68 alive wd	nd	0.69	nd	-2.04	nd	1.81	nd	-0.15	-2.675	nd	nd	2.08	0	nd	neg	neg
P46	T4bN0M0	3	50	EC	S1	MUT	neg	neg	neg	POS	C	46 alive wd	-1.24	0.55	0.39	-2.51	nd	-2.18	nd	1.36	-0.115	-6.15	-6.87	-6.43	5.08746	nd	neg	neg
P47	T3N1M0	3	30	EC	S1	MUT	neg	neg	POS	POS	NC	32 alive wd	0.66	2.05	0	0.62	0.335	-2.74	0.24	1.16	0.705	2.92	1.28	-5.95	5.20945	nd	neg	neg
P48	T3N1M0	2	20	EC	S3	wt	neg	POS	POS	neg	NC	60 alive wd	1.61	-1.24	-0.29	-0.68	-2.115	-0.63	0.32	-3.58	-4.075	0.25	0.34	-0.13	-0.514573	neg	neg	neg
P49	T4bN2M0	2	30	EC	S1	wt	neg	POS	neg	neg	NC	36 alive wd	-4.88	0	-2.49	0.33	0.595	-0.88	2.25	0.86	0.285	-1.82	-3.11	2.71	-0.736966	POS	neg	neg
P50	T2N2M0	3	70	EC	S3	MUT	POS	neg	neg	POS	C	13 META 44 alive	1.77	0.85	2.14	-2.05	-1.405	-2.34	0.21	-0.88	0.855	-1.32	-1.95	-6.19	3.80735	POS	neg	POS
P51	T2N1M0	3	50	EC	S1	MUT	POS	neg	POS	neg	C	44 alive wd	3.97	3.92	0.97	2.73	3.225	2.09	1.54	0.16	1.725	4.42	5.51	-6.73	-0.321928	nd	POS	POS
P52	T4cN2M0	2	10	EC	S3	wt	neg	POS	POS	neg	NC	36 DOD	-3.14	0.24	0.58	1.06	0.035	-1.7	-2.7	-0.9	-1.145	-0.59	0.59	3.95	0	neg	neg	neg
P53	T3N2M0	2	50	EC	S3	wt	neg	POS	nd	neg	NC	44 alive wd	-1.42	3.8	0.33	0.75	-0.995	-1.34	-0.03	-0.26	-0.625	-0.82	-1.07	1.91	-0.415037	nd	neg	neg
P54	T4cN1bM0	2	30	EC	S3	wt	neg	POS	neg	neg	NC	46 alive wd	2.94	-0.16	0.37	-2.92	-1.975	-1.4	-1.04	-3.08	-4.255	0.2	0	-1.16	0.378512	nd	neg	neg
P55	T3N0M0	3	20	EC	S3	MUT	neg	POS	neg	POS	NC	3 META 27 DOD	-5.28	3.56	0.82	-2.19	0.645	-0.6	-2.37	-0.91	-0.415	-0.07	-2.18	-2.91	4.58496	neg	neg	neg
P56	T4bN1bM1	2	30	EC	S3	wt	neg	POS	neg	neg	NC	METADiag 63 alive	-1.05	-0.49	0.88	2.08	0.735	-1.35	-0.62	-0.29	0.125	-0.94	-1.31	2.37	0	nd	neg	neg
P57	T3N0M0	3	30	EC	S2	wt	neg	neg	POS	neg	NC	10 META 18 DOD	-3.05	-0.71	-3.27	0.52	-1.085	-1.5	2.97	1.02	1.565	2.27	2.7	-7.32	-1.73697	neg	neg	neg
P58	T3N1bM0	3	70	EC	S3	wt	neg	neg	nd	POS	NC	31 alive wd	4.17	2.19	1.95	-0.81	0.715	-1.57	-0.17	0.36	0.075	0.04	0.37	-5.27	3.18587	POS	neg	neg
P59	T3N1bM0	2	20	EC	S3	wt	neg	POS	neg	neg	NC	29 alive wd	nd	nd	nd	nd	nd	nd	nd	nd	nd	nd	nd	nd	0.925999	nd	neg	neg
P60	T4aN1M0	2	10	EC	S1	MUT	neg	POS	POS	neg	NC	48 alive wd	-0.01	-0.89	-1.17	-0.43	-2.465	-0.78	2.46	0.73	-1.255	-2.17	-2.15	-0.5	0	nd	neg	neg
P61	T3N1aM0	2	10	EC	S2	wt	neg	POS	neg	neg	NC	50 alive wd	1.13	0.15	-0.99	-0.46	-0.185	-1.35	-0.12	0.59	-0.345	-0.3	-0.61	0.07	0.263034	neg	neg	neg
P62	T3N1bM0	2	10	EC	S2	wt	neg	POS	POS	neg	NC	32 local relapse 58 alive	-2.76	-1.1	-1.61	1.05	-0.255	7.59	0.08	-0.11	0.375	2.37	0.8	0.98	0.137504	nd	neg	neg
P63	T3N1M0	3	20	EC	S3	MUT	POS	neg	POS	neg	C	40 alive wd	2.7	5.03	2.47	5.85	nd	1.82	nd	0.62	3.945	5.54	6.12	-7.24	1.32193	POS	POS	POS
P64	T2N0M0	3	20	EC	S3	MUT	neg	neg	POS	neg	NC	50 alive wd	-1	5.805	-8.8	-1.65	-0.995	-0.54	0.71	2.635	0.935	5.51	5.55	-6.86	-2.32193	neg	neg	neg
P65	T3N1M0	2	30	EC	S3	wt	neg	POS	neg	neg	NC	11 local relapse 36 alive	-0.03	-1.19	-1.37	-1.07	0.495	-1.15	-2.32	-0.45	0.435	-1.29	-0.51	2.52	-0.514573	nd	neg	neg
P66	T2N1bM0	3	10	EC	S3	wt	neg	POS	neg	neg	NC	43 META 56 alive	-2.3	-0.11	0.89	-0.43	2.365	-0.95	-0.78	-1.42	1.745	2.58	1.81	1.2	-0.514573	nd	neg	neg
P67	T2N2M1	3	20	EC	S1	MUT	POS	neg	POS	neg	C	METADiag 36 alive	0.86	3.14	0.51	0.29	0.295	0.18	2.82	1.66	1.455	3.35	3.7	-6.09	1.20163	neg	POS	neg
P68	T4bN1bM1	3	30	EC	S1	MUT	neg	POS	neg	neg	NC	METADiag 4 alive	-0.28	-2.98	0.96	1.07	2.455	0.4	1.3	-1.35	2.365	-0.73	-0.4	0.61	1.32193	nd	neg	neg
P69	T4bN1M0	3	50	EC	S1	MUT	neg	neg	POS	POS	C	50 alive wd	1.02	1.86	1.17	1.97	1.585	-1.89	1.09	0.44	0.485	1.94	2.08	-3.24	3.52356	POS	neg	neg
P70	T3N2M0	2	10	EC	S3	wt	neg	POS	neg	neg	NC	55 META 90 alive	-1.82	-2.04	0.83	-0.62	nd	nd	nd	-1.71	-2.035	0.29	0.21	1.76	0	nd	neg	neg
P71	T2N2M0	3	50	EC	S1	MUT	neg	neg	POS	neg	C	19 alive wd	-0.87	1.73	0.49	-1.96	-3.605	-4.9	0.52	0.21	-1.055	-3.08	-3.04	-4.62	0.137504	neg	neg	neg
P72	T2N0M0	3	10	EC	S2	MUT	neg	POS	neg	neg	NC	44 alive wd	1.89	-0.6	1.28	2.41	0.195	-0.58	0.33	-1.31	1.095	-0.63	-0.57	0.15	1.1375	nd	neg	neg
P73	T4bN1M0	3	20	EC	S3	MUT	neg	neg	POS	neg	C	63 alive wd	6.11	2.6	1.75	1.2	nd	nd	nd	1.54	4.645	1.59	0.66	-7.71	1	nd	neg	neg
P74	T4bN0M0	2	30	EC	S1	wt	neg	POS	neg	neg	NC	46 alive wd	-0.49	-2.29	-0.45	-0.24	-0.475	-0.55	-1.02	-1.23	-1.865	-0.89	0.01	1.25	-1.32193	POS	neg	neg
P75	T3N1M0	2	50	EC	S3	wt	neg	POS	neg	neg	NC	32 META 90 DOD	1.26	-1.75	-0.72	-2.7	0.045	0.48	-1.61	-1.29	-2.535	-0.45	-0.34	2.1	1.72247	neg	neg	neg
P76	T3N1M0	2	20	EC	S2	wt	neg	POS	neg	neg	NC	56 alive wd	1.09	1.99	0.58	-0.06	-1.665	-0.4	-1.3	-1.77	-1.755	0.53	0.42	0.02	0.137504	nd	neg	neg
P77	T2N0M0	3	20	EC	S3	MUT	POS	neg	POS	neg	C	40 alive wd	4.75	4.51	-1.04	0.56	-1.755	nd	-1.64	1.005	1.685	2.91	3.19	-3	-1.73697	POS	neg	POS
P78	T3N1M0	3	40	EC	S1	MUT	POS	neg	POS	POS	C	58 alive wd	3.43	0.59	-15.55	0.06	2.195	0.04	nd	-0.72	-0.315	0.61	1.28	-1.2	3.80735	POS	neg	POS
P79	T3N1M0	2	10	EC	S3	wt	neg	POS	neg	neg	NC	103 alive wd	-5.95	-3.45	-3.67	-2.13	-2.135	1.83	-3.44	-0.77	-0.685	-0.55	0.81	0.46	-0.321928	neg	neg	neg
P80	T3N0M0	3	20	EC	S1	MUT	POS	neg	POS	neg	NA	55 alive wd	3.89	3.75	2.25	4.26	0.745	3.14	2.5	1.76	1.905	3.49	3.87	-6.3	-1.73697	POS	POS	POS
P81	T3N1bM0	3	10	ET	S1	MUT	neg	neg	POS	POS	NA	47 alive wd	4.07	-0.2	2.46	1.18	1.415	0.19	1.09	0.39	3.435	1.69	3.15	-6.6	3.80735	POS	neg	neg
P82	T3N0M0	3	20	EC	S1	MUT	POS	neg	POS	neg	NC	18 META 28 DOD	3.61	1.57	-0.3	1.38	0.365	-0.02	0	-0.78	1.035	1.53	2.68	-8.16	-1.32193	POS	neg	POS
P83	T4aN1M0	3	50	ET	S3	MUT	POS	neg	POS	neg	NA	25 alive wd	1.1	-1.38	0.89	1.15	3.195	nd	2.32	-1.49	2.145	4.75	5.72	-6.2	-0.514573	POS	POS	POS
